# Supplementary material for: Ducks change wintering patterns due to changing climate in the important wintering waters of the Odra River Estuary
Source: PeerJ. 2017 Jul 31;5:e3604. doi: 10.7717/peerj.3604 (PMC5541925; doi:10.7717/peerj.3604)
Supplement: Table S1 — A, date of count; B, season of count; C, species; D, month of count; E, number of days with 100% ice cover 15 days prior to count; F, mean daily temp. 15 days prior to count; G, mean max. temp. 15 days prior to count; H, mean min.temp.15 days prior to count; I, feeding group: B-bottom-feeders, P-piscivorous; J, count method: A - aerial, L - terrrestrial; K, maximum ice cover in the Baltic in thousand km2; L, [ =(Mx/Nx)*100]; M, Count results; N, Size of population in a given season. [file peerj-05-3604-s001.xlsx]

## Sheet: ice_cover
		Nov	Nov	Dec	Dec	Jan	Jan	Feb	Feb	Mar	Mar	April	April
1	1991/1992	1 do 15	16-30	1 do 15	16-30	1 do 15	16-30	1 do 15	16-30	1 do 15	16-30	1 do 15	16-30
2	Number of days with 100% ice cover
1	1992/1993	1 do 15	16-30	1 do 15	16-30	1 do 15	16-30	1 do 15	16-30	1 do 15	16-30	1 do 15	16-30
2	No days with 100% ice cover				5	8
1	93/94	1 do 15	16-30	1 do 15	16-30	1 do 15	16-30	1 do 15	16-30	1 do 15	16-30	1 do 15	16-30
2	No days with 100% ice cover		1	4				2	13	6
1	94/95	1 do 15	16-30	1 do 15	16-30	1 do 15	16-30	1 do 15	16-30	1 do 15	16-30	1 do 15	16-30
2	No days with 100% ice cover					4
1	95/96	1 do 15	16-30	1 do 15	16-30	1 do 15	16-30	1 do 15	16-30	1 do 15	16-30	1 do 15	16-30
2	No days with 100% ice cover			10	16	15	16	15	14	15	16	15
1	96/97	1 do 15	16-30	1 do 15	16-30	1 do 15	16-30	1 do 15	16-30	1 do 15	16-30	1 do 15	16-30
2	No days with 100% ice cover				10	15	13	13	1
1	97/98	1 do 15	16-30	1 do 15	16-30	1 do 15	16-30	1 do 15	16-30	1 do 15	16-30	1 do 15	16-30
2	No days with 100% ice cover				7			2
1	98/99	1 do 15	16-30	1 do 15	16-30	1 do 15	16-30	1 do 15	16-30	1 do 15	16-30	1 do 15	16-30
2	No days with 100% ice cover			12	1			1
1	99/2000	1 do 15	16-30	1 do 15	16-30	1 do 15	16-30	1 do 15	16-30	1 do 15	16-30	1 do 15	16-30
2	No days with 100% ice cover
1	2000/2001	1 do 15	16-30	1 do 15	16-30	1 do 15	16-30	1 do 15	16-30	1 do 15	16-30	1 do 15	16-30
2	No days with 100% ice cover							1
1	2001/2002	1 do 15	16-30	1 do 15	16-30	1 do 15	16-30	1 do 15	16-30	1 do 15	16-30	1 do 15	16-30
2	No days with 100% ice cover				1	14	4
1	2002/2003	1 do 15	16-30	1 do 15	16-30	1 do 15	16-30	1 do 15	16-30	1 do 15	16-30	1 do 15	16-30
2	No days with 100% ice cover			8	16	13		15	13
1	2003/2004	1 do 15	16-30	1 do 15	16-30	1 do 15	16-30	1 do 15	16-30	1 do 15	16-30	1 do 15	16-30
2	No days with 100% ice cover					4	12
1	2004/2005	1 do 15	16-30	1 do 15	16-30	1 do 15	16-30	1 do 15	16-30	1 do 15	16-30	1 do 15	16-30
2	No days with 100% ice cover								4	15
1	2005/2006	1 do 15	16-30	1 do 15	16-30	1 do 15	16-30	1 do 15	16-30	1 do 15	16-30	1 do 15	16-30
2	No days with 100% ice cover					7	16	15	13	15	11
1	2006/2007	1 do 15	16-30	1 do 15	16-30	1 do 15	16-30	1 do 15	16-30	1 do 15	16-30	1 do 15	16-30
2	No days with 100% ice cover
1	2007/2008	1 do 15	16-30	1 do 15	16-30	1 do 15	16-30	1 do 15	16-30	1 do 15	16-30	1 do 15	16-30
2	No days with 100% ice cover
1	2008/2009	1 do 15	16-30	1 do 15	16-30	1 do 15	16-30	1 do 15	16-30	1 do 15	16-30	1 do 15	16-30
2	No days with 100% ice cover						1	7	4
1	2009/2010	1 do 15	16-30	1 do 15	16-30	1 do 15	16-30	1 do 15	16-30	1 do 15	16-30	1 do 15	16-30
2	No days with 100% ice cover					14	16	15	13	8
1	2010/2011	1 do 15	16-30	1 do 15	16-30	1 do 15	16-30	1 do 15	16-30	1 do 15	16-30	1 do 15	16-30
2	No days with 100% ice cover			5	16	15	13		10	4
1	2011/2012	1 do 15	16-30	1 do 15	16-30	1 do 15	16-30	1 do 15	16-30	1 do 15	16-30	1 do 15	16-30
2	No days with 100% ice cover							13	8
1	2012/2013	1 do 15	16-30	1 do 15	16-30	1 do 15	16-30	1 do 15	16-30	1 do 15	16-30	1 do 15	16-30
2	No days with 100% ice cover			3	9		10		7	1
1	2013/2014	1 do 15	16-30	1 do 15	16-30	1 do 15	16-30	1 do 15	16-30	1 do 15	16-30	1 do 15	16-30
2	No days with 100% ice cover						8	11
1	2014/2015	1 do 15	16-30	1 do 15	16-30	1 do 15	16-30	1 do 15	16-30	1 do 15	16-30	1 do 15	16-30
2	No days with 100% ice cover
1	2015/2016	1 do 15	16-30	1 do 15	16-30	1 do 15	16-30	1 do 15	16-30	1 do 15	16-30	1 do 15	16-30
2	No days with 100% ice cover						10	12

## Sheet: Raw_data
Table S1. Raw data. A - date of count. B - season of count. C - species. D - month of count. E - number of days with 100% ice cover 15 days prior to count. F - mean daily temp. 15 days prior to count. G - mean max. temp. 15 days prior to count. H - mean min.temp.15 days prior to count. I - feeding group: B-bottom-feeders, P-piscivorous. J - count method: A - aerial, L - terrrestrial. K - maximum …
date	season	species	month	ice_cover	meanTmin	feed_group	method	max_ice	prop	number	tot_pop_size
1992-01-15	1992	Scaup	1	0	0.49	B	A	74	5.67639	20427	359859
1993-01-15	1993	Scaup	1	8	-2.44	B	A	98	6.31482	18900	299296
1994-01-15	1994	Scaup	1	0	1.43	B	A	221	1.92425	6640	345070
2002-01-15	2002	Scaup	1	15	-4.76	B	L	102	0.0239387	44	183803
2002-11-15	2003	Scaup	11	0	-1.73	B	L	233	8.83507	6844	77464
2003-01-15	2003	Scaup	1	13	-8.95	B	L	233	0.0735826	57	77464
2003-03-15	2003	Scaup	3	0	-2.88	B	L	233	2.66188	2062	77464
2003-11-15	2004	Scaup	11	0	0.22	B	L	153	4.97472	6306	126761
2004-01-24	2004	Scaup	1	10	-6.18	B	L	153	0	0	126761
2004-03-15	2004	Scaup	3	0	-1.74	B	L	153	11.4459	14509	126761
2004-11-15	2005	Scaup	11	0	1.63	B	L	178	12.574	14345	114085
2005-01-15	2005	Scaup	1	0	2.78	B	L	178	47.2893	53950	114085
2005-04-01	2005	Scaup	4	0	-1.6	B	L	178	3.73669	4263	114085
2005-11-15	2006	Scaup	11	0	4.31	B	L	211	4.5708	7500	164085
2006-01-15	2006	Scaup	1	15	-4.44	B	L	211	0.0060944	10	164085
2006-03-20	2006	Scaup	3	6	-6.57	B	L	211	0.792272	1300	164085
2007-11-15	2008	Scaup	11	0	0.69	B	L	49	12.9708	30600	235915
2008-01-15	2008	Scaup	1	0	-1.8	B	L	49	0.552318	1303	235915
2008-03-15	2008	Scaup	3	0	2.43	B	L	49	15.0478	35500	235915
2008-11-15	2009	Scaup	11	0	5.44	B	L	110	1.59463	3470	217606
2009-01-30	2009	Scaup	1	8	-2.93	B	L	110	0	0	217606
2009-03-15	2009	Scaup	3	0	0.69	B	L/A	110	11.6541	25360	217606
2009-11-15	2010	Scaup	11	0	2.49	B	L/A	244	15.1771	23300	153521
2010-01-15	2010	Scaup	1	15	-8.6	B	L	244	0	0	153521
2010-03-25	2010	Scaup	3	0	-0.22	B	L/A	244	6.0578	9300	153521
2010-11-15	2011	Scaup	11	0	3.94	B	L	309	9.31652	8398	90141
2011-01-15	2011	Scaup	1	15	-2.21	B	L/A	309	5.57016	5021	90141
2011-03-20	2011	Scaup	3	0	-1.55	B	L/A	309	44.1397	39788	90141
2011-04-10	2011	Scaup	4	0	3.49	B	L/A	309	100	105733	90141
2011-11-22	2012	Scaup	11	0	-1.37	B	L/A	179	18.9033	28355	150000
2012-01-15	2012	Scaup	1	0	1.25	B	L/A	179	14.52	21780	150000
2012-03-20	2012	Scaup	3	0	0.65	B	L	179	18.012	27018	150000
2012-11-20	2013	Scaup	11	0	2.58	B	L	177	33.0132	47752	144645
2013-01-13	2013	Scaup	1	0	0.44	B	L/A	177	1.75464	2538	144645
2013-04-07	2013	Scaup	4	0	-5.55	B	L	177	20.9285	30272	144645
2013-11-16	2014	Scaup	11	0	3.07	B	L	100	57.567	80295	139481
2014-01-13	2014	Scaup	1	0	1.23	B	L/A	100	24.8421	34650	139481
2014-03-22	2014	Scaup	3	0	1.82	B	L	100	13.4671	18784	139481
2014-11-15	2015	Scaup	11	0	6.6	B	L	51	11.2779	15169	134502
2015-01-18	2015	Scaup	1	0	0.67	B	L	51	7.33595	9867	134502
2015-03-22	2015	Scaup	3	0	0.07	B	L	51	30.6665	41247	134502
2015-11-13	2016	Scaup	11	0	4.04	B	L/A	110	24.9576	32370	129700
2016-01-16	2016	Scaup	1	15	-6.92	B	L	110	0.709329	920	129700
2016-03-20	2016	Scaup	3	0	-1.57	B	L	110	12.6006	16343	129700
1992-01-15	1992	Tufted	1	0	0.49	B	A	74	2.87184	34025	1184780
1993-01-15	1993	Tufted	1	8	-2.44	B	A	98	2.00319	22340	1115220
1994-01-15	1994	Tufted	1	0	1.43	B	A	221	3.8342	42093	1097830
2002-01-15	2002	Tufted	1	15	-4.76	B	L	102	0.11871	1200	1010870
2002-11-15	2003	Tufted	11	0	-1.73	B	L	233	0.650702	6408	984783
2003-01-15	2003	Tufted	1	13	-8.95	B	L	233	0.267775	2637	984783
2003-03-15	2003	Tufted	3	0	-2.88	B	L	233	1.814	17864	984783
2003-11-15	2004	Tufted	11	0	0.22	B	L	153	1.56864	16880	1076090
2004-01-15	2004	Tufted	1	10	-6.18	B	L	153	0.0479514	516	1076090
2004-03-15	2004	Tufted	3	0	-1.74	B	L	153	4.27836	46039	1076090
2004-11-15	2005	Tufted	11	0	1.63	B	L	178	3.44358	32714	950000
2005-01-15	2005	Tufted	1	0	2.78	B	L	178	3.43158	32600	950000
2005-04-01	2005	Tufted	4	0	-1.6	B	L	178	3.88316	36890	950000
2005-11-15	2006	Tufted	11	0	4.31	B	L	211	3.9467	44100	1117390
2006-01-15	2006	Tufted	1	15	-4.44	B	L	211	0.223736	2500	1117390
2006-03-20	2006	Tufted	3	6	-6.57	B	L	211	1.6288	18200	1117390
2007-11-15	2008	Tufted	11	0	0.69	B	L	49	2.4921	24000	963043
2008-01-15	2008	Tufted	1	0	-1.8	B	L	49	1.50855	14528	963043
2008-03-15	2008	Tufted	3	0	2.43	B	L	49	1.96253	18900	963043
2008-11-15	2009	Tufted	11	0	5.44	B	L	110	1.79057	17750	991304
2009-01-30	2009	Tufted	1	8	-2.93	B	L	110	0.1725	1710	991304
2009-03-15	2009	Tufted	3	0	0.69	B	L/A	110	2.64298	26200	991304
2009-11-15	2010	Tufted	11	0	2.49	B	L/A	244	3.14831	26350	836957
2010-01-15	2010	Tufted	1	15	-8.6	B	L	244	0.0244935	205	836957
2010-03-25	2010	Tufted	3	0	-0.22	B	L/A	244	1.84239	15420	836957
2010-11-15	2011	Tufted	11	0	3.94	B	L	309	2.16376	15946	736957
2011-01-15	2011	Tufted	1	15	-2.21	B	L/A	309	0.640472	4720	736957
2011-03-20	2011	Tufted	3	0	-1.55	B	L/A	309	4.42577	32616	736957
2011-04-10	2011	Tufted	4	0	3.49	B	L/A	309	5.69911	42000	736957
2011-11-22	2012	Tufted	11	0	-1.37	B	L/A	179	5.63009	46999	834783
2012-01-15	2012	Tufted	1	0	1.25	B	L/A	179	2.44926	20446	834783
2012-03-20	2012	Tufted	3	0	0.65	B	L	179	3.78494	31596	834783
2012-11-20	2013	Tufted	11	0	2.58	B	L	177	2.36571	19555	826602
2013-01-13	2013	Tufted	1	0	0.44	B	L/A	177	1.41568	11702	826602
2013-04-07	2013	Tufted	4	0	-5.55	B	L	177	4.73553	39144	826602
2013-11-16	2014	Tufted	11	0	3.07	B	L	100	3.62516	29672	818501
2014-01-13	2014	Tufted	1	0	1.23	B	L/A	100	2.68589	21984	818501
2014-03-22	2014	Tufted	3	0	1.82	B	L	100	5.8265	47690	818501
2014-11-15	2015	Tufted	11	0	6.6	B	L	51	2.12343	17210	810480
2015-01-18	2015	Tufted	1	0	0.67	B	L	51	3.33543	27033	810480
2015-03-22	2015	Tufted	3	0	0.07	B	L	51	5.36522	43484	810480
2015-11-13	2016	Tufted	11	0	4.04	B	L/A	110	4.21052	33791	802537
2016-01-16	2016	Tufted	1	15	-6.92	B	L	110	0.0352632	283	802537
2016-03-20	2016	Tufted	3	0	-1.57	B	L	110	4.78993	38441	802537
1992-01-15	1992	Pochard	1	0	0.49	B	A	74	1.83735	5400	293902
1993-01-15	1993	Pochard	1	8	-2.44	B	A	98	0.809443	2300	284146
1994-01-15	1994	Pochard	1	0	1.43	B	A	221	1.16208	3550	305488
2002-01-15	2002	Pochard	1	15	-4.76	B	L	102	0.038	76	200000
2002-11-15	2003	Pochard	11	0	-1.73	B	L	233	0.583728	1260	215854
2003-01-15	2003	Pochard	1	13	-8.95	B	L	233	0	0	215854
2003-03-15	2003	Pochard	3	0	-2.88	B	L	233	0.701863	1515	215854
2003-11-15	2004	Pochard	11	0	0.22	B	L	153	0.291156	648	222561
2004-01-15	2004	Pochard	1	10	-6.18	B	L	153	0.0296548	66	222561
2004-03-15	2004	Pochard	3	0	-1.74	B	L	153	0.51806	1153	222561
2004-11-15	2005	Pochard	11	0	1.63	B	L	178	1.20297	2648	220122
2005-01-15	2005	Pochard	1	0	2.78	B	L	178	2.03433	4478	220122
2005-04-01	2005	Pochard	4	0	-1.6	B	L	178	0.0940388	207	220122
2005-11-15	2006	Pochard	11	0	4.31	B	L	211	1.47266	3080	209146
2006-01-15	2006	Pochard	1	15	-4.44	B	L	211	0.0597669	125	209146
2006-03-20	2006	Pochard	3	6	-6.57	B	L	211	0.32035	670	209146
2007-11-15	2008	Pochard	11	0	0.69	B	L	49	1.6	3200	200000
2008-01-15	2008	Pochard	1	0	-1.8	B	L	49	1.133	2266	200000
2008-03-15	2008	Pochard	3	0	2.43	B	L	49	0.9	1800	200000
2008-11-15	2009	Pochard	11	0	5.44	B	L	110	0.220984	318	143902
2009-01-30	2009	Pochard	1	8	-2.93	B	L	110	0.152882	220	143902
2009-03-15	2009	Pochard	3	0	0.69	B	L/A	110	2.53645	3650	143902
2009-11-15	2010	Pochard	11	0	2.49	B	L/A	244	0.271578	361	132927
2010-01-15	2010	Pochard	1	15	-8.6	B	L	244	0	0	132927
2010-03-25	2010	Pochard	3	0	-0.22	B	L/A	244	0.0285871	38	132927
2010-11-15	2011	Pochard	11	0	3.94	B	L	309	0.285725	392	137195
2011-01-15	2011	Pochard	1	15	-2.21	B	L/A	309	0.00145778	2	137195
2011-03-20	2011	Pochard	3	0	-1.55	B	L/A	309	0.208462	286	137195
2011-04-10	2011	Pochard	4	0	3.49	B	L/A	309	0.532089	730	137195
2011-11-22	2012	Pochard	11	0	-1.37	B	L/A	179	1.41694	2255	159146
2012-01-15	2012	Pochard	1	0	1.25	B	L/A	179	0.486974	775	159146
2012-03-20	2012	Pochard	3	0	0.65	B	L	179	0.185364	295	159146
2012-11-20	2013	Pochard	11	0	2.58	B	L	177	1.2385	1905	153815
2013-01-13	2013	Pochard	1	0	0.44	B	L/A	177	0.00715145	11	153815
2013-04-07	2013	Pochard	4	0	-5.55	B	L	177	0.433638	667	153815
2013-11-16	2014	Pochard	11	0	3.07	B	L	100	1.00227	1490	148662
2014-01-13	2014	Pochard	1	0	1.23	B	L/A	100	0.845542	1257	148662
2014-03-22	2014	Pochard	3	0	1.82	B	L	100	0.17153	255	148662
2014-11-15	2015	Pochard	11	0	6.6	B	L	51	0.61316	881	143682
2015-01-18	2015	Pochard	1	0	0.67	B	L	51	1.08712	1562	143682
2015-03-22	2015	Pochard	3	0	0.07	B	L	51	0.363998	523	143682
2015-11-13	2016	Pochard	11	0	4.04	B	L/A	110	0.362214	503	138868
2016-01-16	2016	Pochard	1	15	-6.92	B	L	110	0	0	138868
2016-03-20	2016	Pochard	3	0	-1.57	B	L	110	0.19875	276	138868
1992-01-15	1992	Goldeneye	1	0	0.49	B	A	74	4.4761	11840	264516
1993-01-15	1993	Goldeneye	1	8	-2.44	B	A	98	1.18181	2891	244624
1994-01-15	1994	Goldeneye	1	0	1.43	B	A	221	2.95538	7738	261828
2002-01-15	2002	Goldeneye	1	15	-4.76	B	L	102	0.152744	395	258602
2002-11-15	2003	Goldeneye	11	0	-1.73	B	L	233	0.302861	806	266129
2003-01-15	2003	Goldeneye	1	13	-8.95	B	L	233	0.335552	893	266129
2003-03-15	2003	Goldeneye	3	0	-2.88	B	L	233	1.89307	5038	266129
2003-11-15	2004	Goldeneye	11	0	0.22	B	L	153	0.605988	1730	285484
2004-01-15	2004	Goldeneye	1	10	-6.18	B	L	153	0.751356	2145	285484
2004-03-15	2004	Goldeneye	3	0	-1.74	B	L	153	1.60219	4574	285484
2004-11-15	2005	Goldeneye	11	0	1.63	B	L	178	0.874359	2200	251613
2005-01-15	2005	Goldeneye	1	0	2.78	B	L	178	1.43196	3603	251613
2005-04-01	2005	Goldeneye	4	0	-1.6	B	L	178	0.545282	1372	251613
2005-11-15	2006	Goldeneye	11	0	4.31	B	L	211	1.19759	3200	267204
2006-01-15	2006	Goldeneye	1	15	-4.44	B	L	211	0.163171	436	267204
2006-03-20	2006	Goldeneye	3	6	-6.57	B	L	211	0.24326	650	267204
2007-11-15	2008	Goldeneye	11	0	0.69	B	L	49	0.829578	1900	229032
2008-01-15	2008	Goldeneye	1	0	-1.8	B	L	49	1.13783	2606	229032
2008-03-15	2008	Goldeneye	3	0	2.43	B	L	49	1.78578	4090	229032
2008-11-15	2009	Goldeneye	11	0	5.44	B	L	110	0.68561	1773	258602
2009-01-30	2009	Goldeneye	1	8	-2.93	B	L	110	1.14075	2950	258602
2009-03-15	2009	Goldeneye	3	0	0.69	B	L/A	110	1.31476	3400	258602
2009-11-15	2010	Goldeneye	11	0	2.49	B	L/A	244	1.21246	3155	260215
2010-01-15	2010	Goldeneye	1	15	-8.6	B	L	244	0.032281	84	260215
2010-03-25	2010	Goldeneye	3	0	-0.22	B	L/A	244	0.678285	1765	260215
2010-11-15	2011	Goldeneye	11	0	3.94	B	L	309	0.785542	2099	267204
2011-01-15	2011	Goldeneye	1	15	-2.21	B	L/A	309	0.582327	1556	267204
2011-03-20	2011	Goldeneye	3	0	-1.55	B	L/A	309	3.43707	9184	267204
2011-04-10	2011	Goldeneye	4	0	3.49	B	L/A	309	0.224548	600	267204
2011-11-22	2012	Goldeneye	11	0	-1.37	B	L/A	179	2.34857	5480	233333
2012-01-15	2012	Goldeneye	1	0	1.25	B	L/A	179	1.43143	3340	233333
2012-03-20	2012	Goldeneye	3	0	0.65	B	L	179	0.938573	2190	233333
2012-11-20	2013	Goldeneye	11	0	2.58	B	L	177	0.677524	1585	233940
2013-01-13	2013	Goldeneye	1	0	0.44	B	L/A	177	1.65384	3869	233940
2013-04-07	2013	Goldeneye	4	0	-5.55	B	L	177	2.11892	4957	233940
2013-11-16	2014	Goldeneye	11	0	3.07	B	L	100	2.23707	5247	234548
2014-01-13	2014	Goldeneye	1	0	1.23	B	L/A	100	1.03859	2436	234548
2014-03-22	2014	Goldeneye	3	0	1.82	B	L	100	0.520576	1221	234548
2014-11-15	2015	Goldeneye	11	0	6.6	B	L	51	2.03863	4794	235158
2015-01-18	2015	Goldeneye	1	0	0.67	B	L	51	2.56508	6032	235158
2015-03-22	2015	Goldeneye	3	0	0.07	B	L	51	1.14136	2684	235158
2015-11-13	2016	Goldeneye	11	0	4.04	B	L/A	110	1.17997	2782	235769
2016-01-16	2016	Goldeneye	1	15	-6.92	B	L	110	0.18832	444	235769
2016-03-20	2016	Goldeneye	3	0	-1.57	B	L	110	0.626461	1477	235769
1992-01-15	1992	Coot	1	0	0.49	B	A	74	0.860217	8650	1005560
1993-01-15	1993	Coot	1	8	-2.44	B	A	98	0.675411	6579	974074
1994-01-15	1994	Coot	1	0	1.43	B	A	221	0.589627	5798	983333
2002-01-15	2002	Coot	1	15	-4.76	B	L	102	0.0408404	450	1101850
2002-11-15	2003	Coot	11	0	-1.73	B	L	233	0.617959	6500	1051850
2003-01-15	2003	Coot	1	13	-8.95	B	L	233	0.0535247	563	1051850
2003-03-15	2003	Coot	3	0	-2.88	B	L	233	0.63935	6725	1051850
2003-11-15	2004	Coot	11	0	0.22	B	L	153	0.559647	6125	1094440
2004-01-15	2004	Coot	1	10	-6.18	B	L	153	0.185757	2033	1094440
2004-03-15	2004	Coot	3	0	-1.74	B	L	153	0.580297	6351	1094440
2004-11-15	2005	Coot	11	0	1.63	B	L	178	0.901487	9883	1096300
2005-01-15	2005	Coot	1	0	2.78	B	L	178	2.0478	22450	1096300
2005-04-01	2005	Coot	4	0	-1.6	B	L	178	0.277479	3042	1096300
2005-11-15	2006	Coot	11	0	4.31	B	L	211	0.612566	6500	1061110
2006-01-15	2006	Coot	1	15	-4.44	B	L	211	0.0716231	760	1061110
2006-03-20	2006	Coot	3	6	-6.57	B	L	211	0.0980106	1040	1061110
2007-11-15	2008	Coot	11	0	0.69	B	L	49	1.12336	11400	1014810
2008-01-15	2008	Coot	1	0	-1.8	B	L	49	0.935348	9492	1014810
2008-03-15	2008	Coot	3	0	2.43	B	L	49	0.660222	6700	1014810
2008-11-15	2009	Coot	11	0	5.44	B	L	110	0.425343	4600	1081480
2009-01-30	2009	Coot	1	8	-2.93	B	L	110	0.157192	1700	1081480
2009-03-15	2009	Coot	3	0	0.69	B	L/A	110	0.341199	3690	1081480
2009-11-15	2010	Coot	11	0	2.49	B	L/A	244	0.915255	9000	983333
2010-01-15	2010	Coot	1	15	-8.6	B	L	244	0.115831	1139	983333
2010-03-25	2010	Coot	3	0	-0.22	B	L/A	244	0.222203	2185	983333
2010-11-15	2011	Coot	11	0	3.94	B	L	309	0.401464	3747	933333
2011-01-15	2011	Coot	1	15	-2.21	B	L/A	309	0.0251786	235	933333
2011-03-20	2011	Coot	3	0	-1.55	B	L/A	309	0.224893	2099	933333
2011-04-10	2011	Coot	4	0	3.49	B	L/A	309	0.482143	4500	933333
2011-11-22	2012	Coot	11	0	-1.37	B	L/A	179	1.04792	9897	944444
2012-01-15	2012	Coot	1	0	1.25	B	L/A	179	0.637094	6017	944444
2012-03-20	2012	Coot	3	0	0.65	B	L	179	0.4626	4369	944444
2012-11-20	2013	Coot	11	0	2.58	B	L	177	1.79342	16970	946238
2013-01-13	2013	Coot	1	0	0.44	B	L/A	177	0.108112	1023	946238
2013-04-07	2013	Coot	4	0	-5.55	B	L	177	0.854436	8085	946238
2013-11-16	2014	Coot	11	0	3.07	B	L	100	0.838365	7948	948036
2014-01-13	2014	Coot	1	0	1.23	B	L/A	100	1.06979	10142	948036
2014-03-22	2014	Coot	3	0	1.82	B	L	100	0.819695	7771	948036
2014-11-15	2015	Coot	11	0	6.6	B	L	51	1.30601	12405	949838
2015-01-18	2015	Coot	1	0	0.67	B	L	51	0.785818	7464	949838
2015-03-22	2015	Coot	3	0	0.07	B	L	51	0.702962	6677	949838
2015-11-13	2016	Coot	11	0	4.04	B	L/A	110	0.85715	8157	951642
2016-01-16	2016	Coot	1	15	-6.92	B	L	110	0.0306838	292	951642
2016-03-20	2016	Coot	3	0	-1.57	B	L	110	0.680928	6480	951642
1992-01-15	1992	Smew	1	0	0.49	P	A	74	7.04491	935	13272
1993-01-15	1993	Smew	1	8	-2.44	P	A	98	48.449	10527	21728
1994-01-15	1994	Smew	1	0	1.43	P	A	221	24.605	4283	17407
2002-01-15	2002	Smew	1	15	-4.76	P	L	102	11.3625	3023	26605
2002-11-15	2003	Smew	11	0	-1.73	P	L	233	3.13719	732	23333
2003-01-15	2003	Smew	1	13	-8.95	P	L	233	5.45579	1273	23333
2003-03-15	2003	Smew	3	0	-2.88	P	L	233	4.89007	1141	23333
2003-11-15	2004	Smew	11	0	0.22	P	L	153	0.512235	166	32407
2004-01-15	2004	Smew	1	10	-6.18	P	L	153	1.68482	546	32407
2004-03-15	2004	Smew	3	0	-1.74	P	L	153	6.36899	2064	32407
2004-11-15	2005	Smew	11	0	1.63	P	L	178	2.14334	471	21975
2005-01-15	2005	Smew	1	0	2.78	P	L	178	8.25939	1815	21975
2005-04-01	2005	Smew	4	0	-1.6	P	L	178	1.98862	437	21975
2005-11-15	2006	Smew	11	0	4.31	P	L	211	6.87166	1790	26049
2006-01-15	2006	Smew	1	15	-4.44	P	L	211	0.445315	116	26049
2006-03-20	2006	Smew	3	6	-6.57	P	L	211	6.71811	1750	26049
2007-11-15	2008	Smew	11	0	0.69	P	L	49	11.1572	2500	22407
2008-01-15	2008	Smew	1	0	-1.8	P	L	49	7.90824	1772	22407
2008-03-15	2008	Smew	3	0	2.43	P	L	49	8.47949	1900	22407
2008-11-15	2009	Smew	11	0	5.44	P	L	110	3.52986	828	23457
2009-01-30	2009	Smew	1	8	-2.93	P	L	110	16.072	3770	23457
2009-03-15	2009	Smew	3	0	0.69	P	L/A	110	8.09993	1900	23457
2009-11-15	2010	Smew	11	0	2.49	P	L/A	244	1.06491	188	17654
2010-01-15	2010	Smew	1	15	-8.6	P	L	244	1.48408	262	17654
2010-03-25	2010	Smew	3	0	-0.22	P	L/A	244	3.75552	663	17654
2010-11-15	2011	Smew	11	0	3.94	P	L	309	1.11449	194	17407
2011-01-15	2011	Smew	1	15	-2.21	P	L/A	309	5.39438	939	17407
2011-03-20	2011	Smew	3	0	-1.55	P	L/A	309	22.2956	3881	17407
2011-04-10	2011	Smew	4	0	3.49	P	L/A	309	2.87241	500	17407
2011-11-22	2012	Smew	11	0	-1.37	P	L/A	179	4.26088	1010	23704
2012-01-15	2012	Smew	1	0	1.25	P	L/A	179	8.60192	2039	23704
2012-03-20	2012	Smew	3	0	0.65	P	L	179	4.10901	974	23704
2012-11-20	2013	Smew	11	0	2.58	P	L	177	0.910182	220	24171
2013-01-13	2013	Smew	1	0	0.44	P	L/A	177	13.2225	3196	24171
2013-04-07	2013	Smew	4	0	-5.55	P	L	177	4.87361	1178	24171
2013-11-16	2014	Smew	11	0	3.07	P	L	100	1.93127	476	24647
2014-01-13	2014	Smew	1	0	1.23	P	L/A	100	14.6955	3622	24647
2014-03-22	2014	Smew	3	0	1.82	P	L	100	1.2821	316	24647
2014-11-15	2015	Smew	11	0	6.6	P	L	51	5.35949	1347	25133
2015-01-18	2015	Smew	1	0	0.67	P	L	51	8.47889	2131	25133
2015-03-22	2015	Smew	3	0	0.07	P	L	51	1.63132	410	25133
2015-11-13	2016	Smew	11	0	4.04	P	L/A	110	0.546278	140	25628
2016-01-16	2016	Smew	1	15	-6.92	P	L	110	2.71578	696	25628
2016-03-20	2016	Smew	3	0	-1.57	P	L	110	2.7626	708	25628
1992-01-15	1992	Goosander	1	0	0.49	P	A	74	12.5918	16350	129846
1993-01-15	1993	Goosander	1	8	-2.44	P	A	98	17.818	31908	179077
1994-01-15	1994	Goosander	1	0	1.43	P	A	221	19.27	33085	171692
2002-01-15	2002	Goosander	1	15	-4.76	P	L	102	16.7864	21280	126769
2002-11-15	2003	Goosander	11	0	-1.73	P	L	233	1.44872	2260	156000
2003-01-15	2003	Goosander	1	13	-8.95	P	L	233	7.28782	11369	156000
2003-03-15	2003	Goosander	3	0	-2.88	P	L	233	1.73077	2700	156000
2003-11-15	2004	Goosander	11	0	0.22	P	L	153	1.21213	2014	166154
2004-01-15	2004	Goosander	1	10	-6.18	P	L	153	3.81393	6337	166154
2004-03-15	2004	Goosander	3	0	-1.74	P	L	153	2.6349	4378	166154
2004-11-15	2005	Goosander	11	0	1.63	P	L	178	0.734364	766	104308
2005-01-15	2005	Goosander	1	0	2.78	P	L	178	2.89048	3015	104308
2005-04-01	2005	Goosander	4	0	-1.6	P	L	178	0.849408	886	104308
2005-11-15	2006	Goosander	11	0	4.31	P	L	211	1.24834	1740	139385
2006-01-15	2006	Goosander	1	15	-4.44	P	L	211	5.16555	7200	139385
2006-03-20	2006	Goosander	3	6	-6.57	P	L	211	13.4161	18700	139385
2007-11-15	2008	Goosander	11	0	0.69	P	L	49	1.10234	1160	105231
2008-01-15	2008	Goosander	1	0	-1.8	P	L	49	6.84209	7200	105231
2008-03-15	2008	Goosander	3	0	2.43	P	L	49	16.1549	17000	105231
2008-11-15	2009	Goosander	11	0	5.44	P	L	110	0.671339	818	121846
2009-01-30	2009	Goosander	1	8	-2.93	P	L	110	19.697	24000	121846
2009-03-15	2009	Goosander	3	0	0.69	P	L/A	110	15.5935	19000	121846
2009-11-15	2010	Goosander	11	0	2.49	P	L/A	244	1.38057	1525	110462
2010-01-15	2010	Goosander	1	15	-8.6	P	L	244	10.1492	11211	110462
2010-03-25	2010	Goosander	3	0	-0.22	P	L/A	244	2.67332	2953	110462
2010-11-15	2011	Goosander	11	0	3.94	P	L	309	0.75365	858	113846
2011-01-15	2011	Goosander	1	15	-2.21	P	L/A	309	7.00244	7972	113846
2011-03-20	2011	Goosander	3	0	-1.55	P	L/A	309	9.69907	11042	113846
2011-04-10	2011	Goosander	4	0	3.49	P	L/A	309	0.87838	1000	113846
2011-11-22	2012	Goosander	11	0	-1.37	P	L/A	179	7.25766	7347	101231
2012-01-15	2012	Goosander	1	0	1.25	P	L/A	179	8.71769	8825	101231
2012-03-20	2012	Goosander	3	0	0.65	P	L	179	1.81565	1838	101231
2012-11-20	2013	Goosander	11	0	2.58	P	L	177	1.41487	1431	101140
2013-01-13	2013	Goosander	1	0	0.44	P	L/A	177	23.6247	23894	101140
2013-04-07	2013	Goosander	4	0	-5.55	P	L	177	4.28614	4335	101140
2013-11-16	2014	Goosander	11	0	3.07	P	L	100	4.7472	4797	101049
2014-01-13	2014	Goosander	1	0	1.23	P	L/A	100	9.3994	9498	101049
2014-03-22	2014	Goosander	3	0	1.82	P	L	100	1.37557	1390	101049
2014-11-15	2015	Goosander	11	0	6.6	P	L	51	1.06777	1078	100958
2015-01-18	2015	Goosander	1	0	0.67	P	L	51	9.93284	10028	100958
2015-03-22	2015	Goosander	3	0	0.07	P	L	51	2.76452	2791	100958
2015-11-13	2016	Goosander	11	0	4.04	P	L/A	110	0.425313	429	100867
2016-01-16	2016	Goosander	1	15	-6.92	P	L	110	21.106	21289	100867
2016-03-20	2016	Goosander	3	0	-1.57	P	L	110	1.80138	1817	100867

## Sheet: Arkusz1
Fixed	effects:
	Estimate	se	df	t	Pr(>|t|)
(Intercept)	-49.3721	20.3517	31.18	-2.426	0.0212	*
ice15	-0.06203	0.01072	42.38	-5.787	7.82e-07	***
winter	0.02513	0.01013	31.02	2.48	0.0188	*
---

## Sheet: Arkusz2
scaup	tufted	pochard	goldeneye	coot	smew	goosander
5.67639	2.87184	1.83735	4.4761	0.860217	7.04491	12.5918
6.31482	2.00319	0.809443	1.18181	0.675411	48.449	17.818
1.92425	3.8342	1.16208	2.95538	0.589627	24.605	19.27
0.0239387	0.11871	0.038	0.152744	0.0408404	11.3625	16.7864
8.83507	0.650702	0.583728	0.302861	0.617959	3.13719	1.44872
0.0735826	0.267775	0	0.335552	0.0535247	5.45579	7.28782
2.66188	1.814	0.701863	1.89307	0.63935	4.89007	1.73077
4.97472	1.56864	0.291156	0.605988	0.559647	0.512235	1.21213
0	0.0479514	0.0296548	0.751356	0.185757	1.68482	3.81393
11.4459	4.27836	0.51806	1.60219	0.580297	6.36899	2.6349
12.574	3.44358	1.20297	0.874359	0.901487	2.14334	0.734364
47.2893	3.43158	2.03433	1.43196	2.0478	8.25939	2.89048
3.73669	3.88316	0.0940388	0.545282	0.277479	1.98862	0.849408
4.5708	3.9467	1.47266	1.19759	0.612566	6.87166	1.24834
0.0060944	0.223736	0.0597669	0.163171	0.0716231	0.445315	5.16555
0.792272	1.6288	0.32035	0.24326	0.0980106	6.71811	13.4161
12.9708	2.4921	1.6	0.829578	1.12336	11.1572	1.10234
0.552318	1.50855	1.133	1.13783	0.935348	7.90824	6.84209
15.0478	1.96253	0.9	1.78578	0.660222	8.47949	16.1549
1.59463	1.79057	0.220984	0.68561	0.425343	3.52986	0.671339
0	0.1725	0.152882	1.14075	0.157192	16.072	19.697
11.6541	2.64298	2.53645	1.31476	0.341199	8.09993	15.5935
15.1771	3.14831	0.271578	1.21246	0.915255	1.06491	1.38057
0	0.0244935	0	0.032281	0.115831	1.48408	10.1492
6.0578	1.84239	0.0285871	0.678285	0.222203	3.75552	2.67332
9.31652	2.16376	0.285725	0.785542	0.401464	1.11449	0.75365
5.57016	0.640472	0.00145778	0.582327	0.0251786	5.39438	7.00244
44.1397	4.42577	0.208462	3.43707	0.224893	22.2956	9.69907
100	5.69911	0.532089	0.224548	0.482143	2.87241	0.87838
18.9033	5.63009	1.41694	2.34857	1.04792	4.26088	7.25766
14.52	2.44926	0.486974	1.43143	0.637094	8.60192	8.71769
18.012	3.78494	0.185364	0.938573	0.4626	4.10901	1.81565
33.0132	2.36571	1.2385	0.677524	1.79342	0.910182	1.41487
1.75464	1.41568	0.00715145	1.65384	0.108112	13.2225	23.6247
20.9285	4.73553	0.433638	2.11892	0.854436	4.87361	4.28614
57.567	3.62516	1.00227	2.23707	0.838365	1.93127	4.7472
24.8421	2.68589	0.845542	1.03859	1.06979	14.6955	9.3994
13.4671	5.8265	0.17153	0.520576	0.819695	1.2821	1.37557
11.2779	2.12343	0.61316	2.03863	1.30601	5.35949	1.06777
7.33595	3.33543	1.08712	2.56508	0.785818	8.47889	9.93284
30.6665	5.36522	0.363998	1.14136	0.702962	1.63132	2.76452
24.9576	4.21052	0.362214	1.17997	0.85715	0.546278	0.425313
0.709329	0.0352632	0	0.18832	0.0306838	2.71578	21.106
12.6006	4.78993	0.19875	0.626461	0.680928	2.7626	1.80138
14.1713	2.61148	0.623632	1.21055	0.609914	7.01242	6.84621	mean
18.8114	1.69074	0.620965	0.932551	0.446715	8.40969	6.72124	SD
6.63325	6.63325	6.63325	6.63325	6.63325	6.63325	6.63325
2.83593	0.254888	0.093614	0.140587	0.0673448	1.26781	1.01327	SE
